# Supplementary material for: ADNP dysregulates methylation and mitochondrial gene expression in the cerebellum of a Helsmoortel–Van der Aa syndrome autopsy case
Source: Springer Nature journal article supplement (doi:10.1186/s40478-024-01743-w), 2024-04-18
Supplement: MOESM7 [file 26995018]

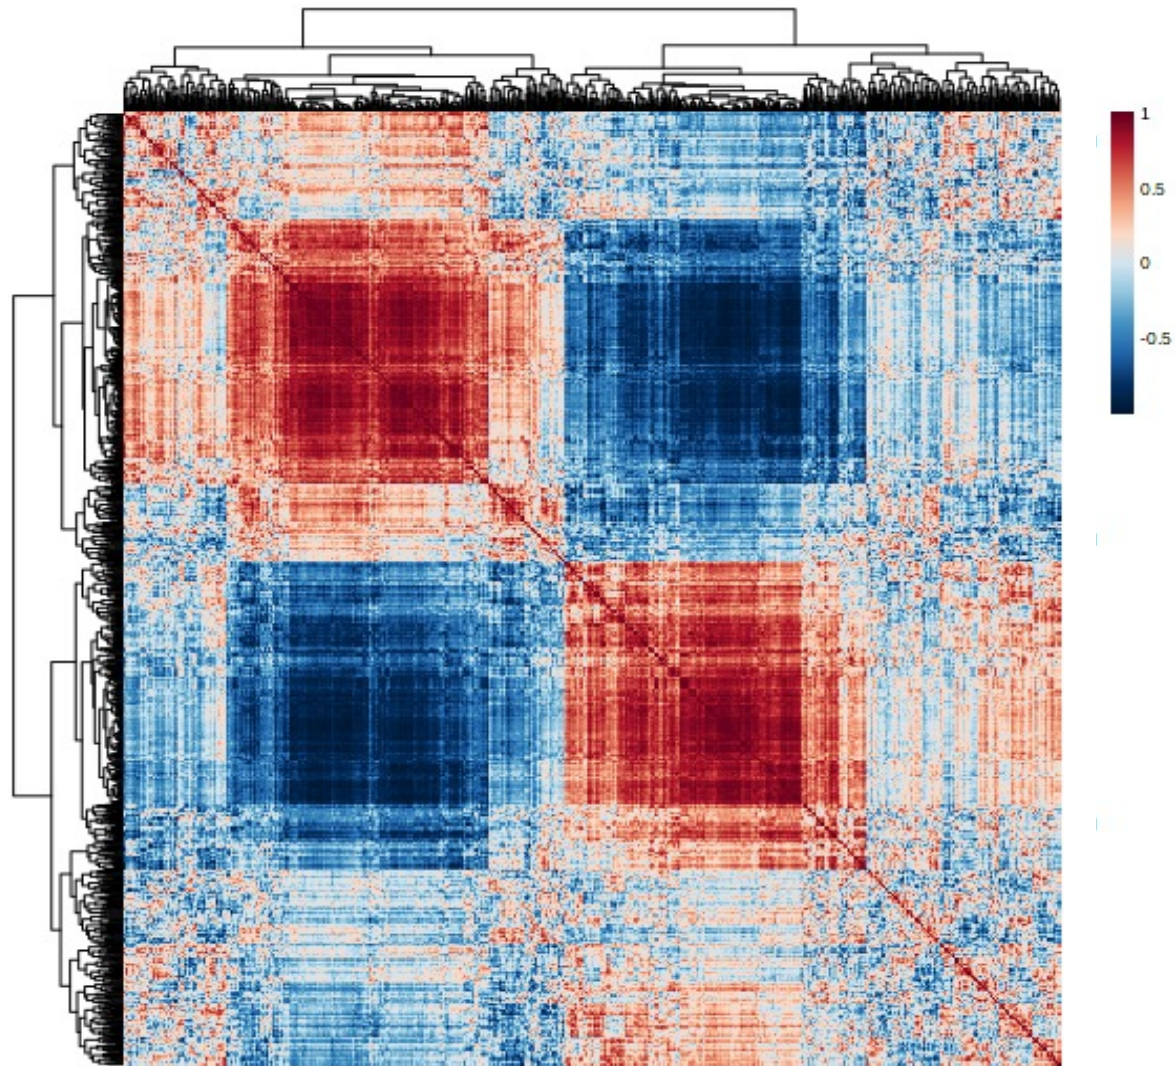

**Supplementary figure S7. Correlation heatmap of the LFQ-MS experiment.** Pairwise correlations of protein abundances characterizing the relationships between proteins of the global mass spectrometry experiment. Correlations between all proteins, clustering of protein groups and similarly behaving proteins are represented in this protein-protein correlation matrix calculated on the logarithmic intensities. A strong correlation between the technical replicates ( $n = 5$ ) was observed (red colour) indicating high reproducibility as tested by the Pearson correlation. Negative correlations are represented in a blue color (see legend).
