# Supplementary material for: ADNP dysregulates methylation and mitochondrial gene expression in the cerebellum of a Helsmoortel–Van der Aa syndrome autopsy case
Source: Springer Nature journal article supplement (doi:10.1186/s40478-024-01743-w), 2024-04-18

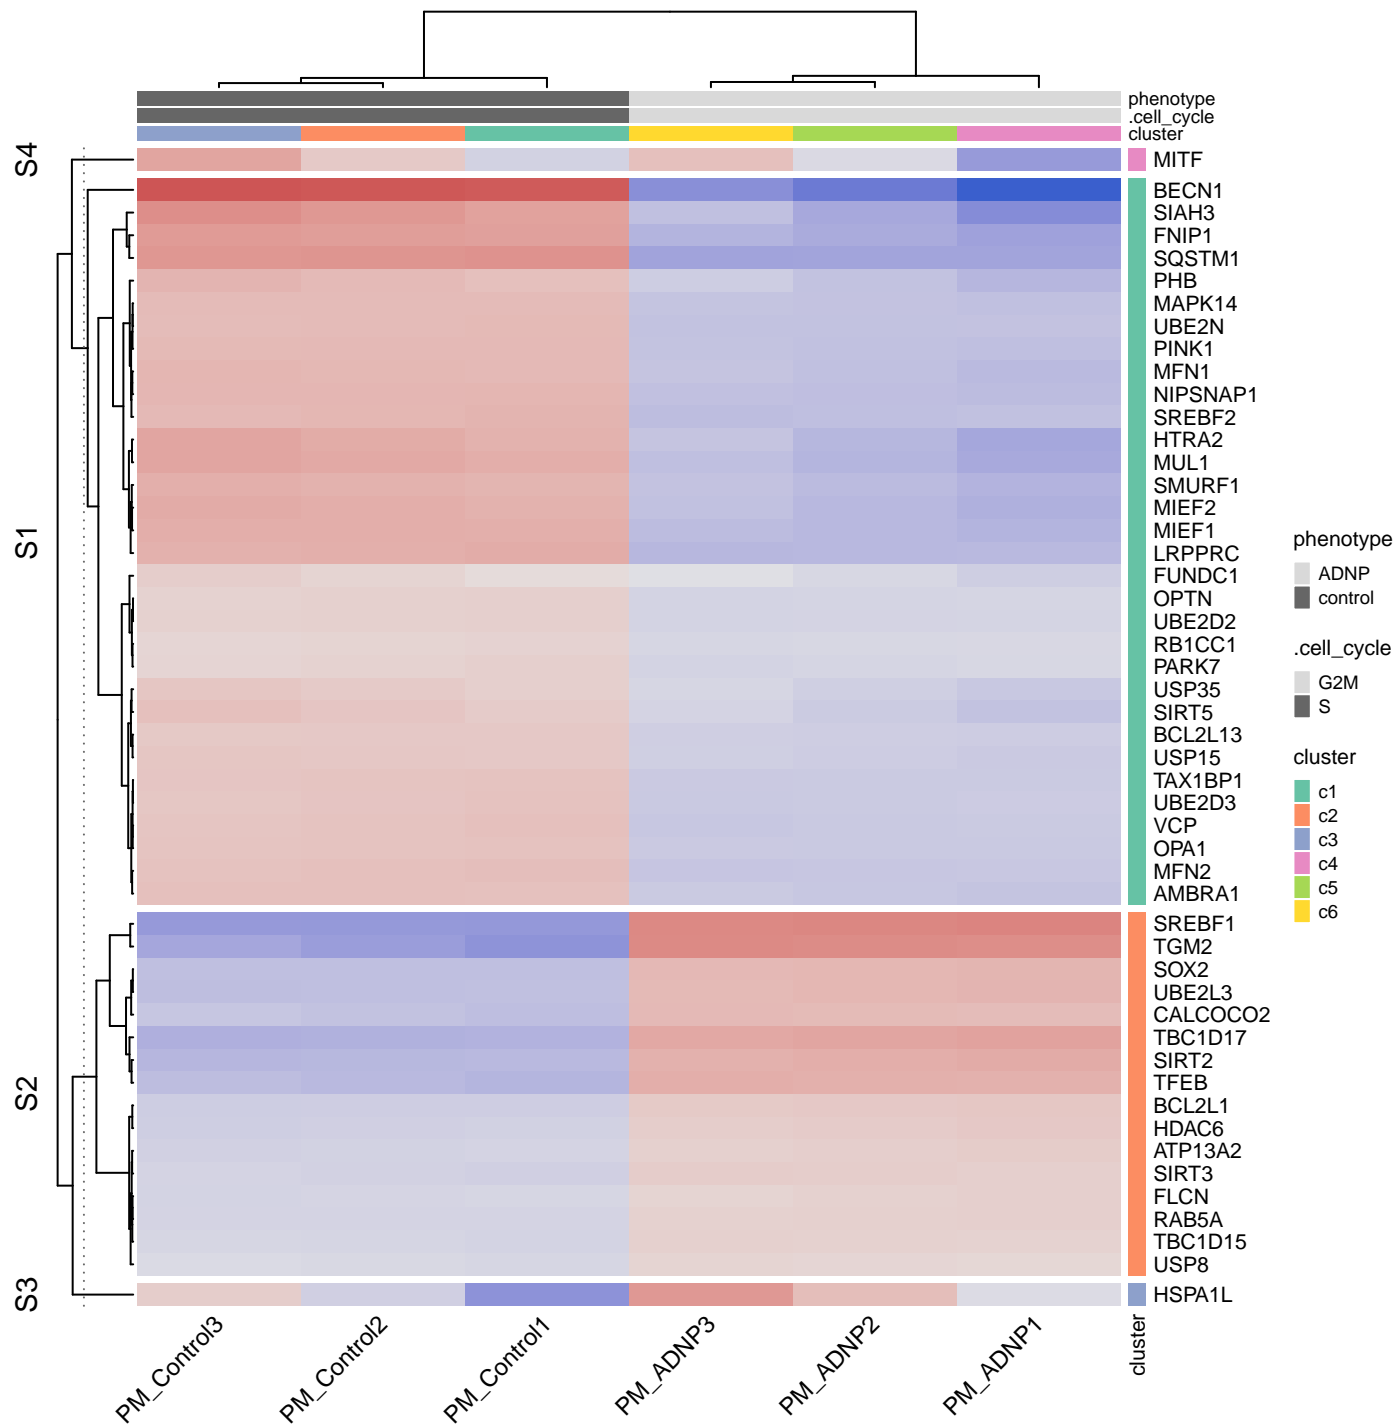

Supplement: MOESM9 [file 26995018]
